# Supplementary material
Source: Elsevier journal article supplement (https://www.sciencedirect.com/science/article/pii/S1885585717301196)
Supplement: mmc1 [file S1885585717301196:mmc1.pdf]

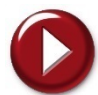

## Material suplementario

# Prevalencia de patrones electrocardiográficos asociados a muerte súbita en la población española de 40 años o más. Resultados del estudio OFRECE

### ANEXO 1. COMITÉ DE DIRECCIÓN, COORDINADORES, INVESTIGADORES, COLABORADORES Y CENTRO DE LECTURA

#### Comité de dirección

|                          |                                                                                                                                                                                                                                                                                                                                                                                                           |
|--------------------------|-----------------------------------------------------------------------------------------------------------------------------------------------------------------------------------------------------------------------------------------------------------------------------------------------------------------------------------------------------------------------------------------------------------|
| <i>Comité ejecutivo</i>  | Juan José Gómez Doblas, Servicio de Cardiología, Hospital Clínico Universitario Virgen de la Victoria, Málaga; Javier Muñiz, Instituto de Ciencias de la Salud, Universidad de A Coruña, A Coruña; Joaquín J. Alonso Martín, Servicio de Cardiología, Hospital Universitario Getafe, Madrid; Eulalia Roig, Servicio de Cardiología, Hospital de la Santa Creu i Sant Pau, Barcelona                       |
| <i>Comité científico</i> | Gustavo Rodríguez-Roca, Centro de Salud La Puebla de Montalbán, Toledo; José María Lobos, Centro de Salud Villablanca, Madrid; Gaietà Permanyer, Servicio de Cardiología, Hospital Universitario Vall d'Hebron, Barcelona; Francisco Javier Chorro, Servicio de Cardiología, Hospital Clínico Universitario de Valencia, Valencia; Manuel Anguita, Servicio de Cardiología, Hospital Reina Sofía, Córdoba |

#### Coordinadores, investigadores y colaboradores

| <i>Comunidad autónoma</i> | <i>Provincia</i> | <i>Coordinador</i>  | <i>Investigadores y colaboradores de atención primaria</i>                                                                                                                                                                                         |
|---------------------------|------------------|---------------------|----------------------------------------------------------------------------------------------------------------------------------------------------------------------------------------------------------------------------------------------------|
| Andalucía                 | Almería          | Jacinto Benítez Gil | Francisco Garzón Montero; Virginia Bueno del Campo; Carmen Montabes Pereira; Santiago López Fábrega; Francisco Javier Almecija Flores; Eduardo C. Mecáñez García<br><br><i>Colaboradores:</i> Jesús Enrique Montoro Robles; Manuela González López |
|                           | Cádiz            | Manuel Ruiz Ruiz    | Juan Carlos Molina Deudero; Inmaculada País Mateos; Javier Rodríguez                                                                                                                                                                               |

|        |         |                                     |                                                                                                                                                                                                                                                                                                                                                                                                              |
|--------|---------|-------------------------------------|--------------------------------------------------------------------------------------------------------------------------------------------------------------------------------------------------------------------------------------------------------------------------------------------------------------------------------------------------------------------------------------------------------------|
|        |         |                                     | Conejo; Dolores Montero Fuentes-Guerra; Myrian Olivares Morales; Raquel de Lara Muñoz; Milagros Pérez López; Francisco Umbría Campoo; José María Tenorio Sánchez                                                                                                                                                                                                                                             |
|        | Córdoba | Manuel Anguita Sánchez              | Emilio García Criado; Jorge Martínez de la Iglesia; Juana Redondo Sánchez; Enrique Martín Rioboo; Juana María González Barranco; Francisco Javier Ruiz Moruno; María Auxiliadora Cabanás Espejo; Trinidad Lechuga Varona; Cristina Aguado Taberne; Juan José García Gallego<br><i>Colaboradora:</i> Antonia Calero Espino                                                                                    |
|        | Granada | Pablo Toledo Frías                  | Nieves Hitos Henares; Rosario López Bueno; Adoración Caba Martín; Concepción Molina Serrano; Concepción Macía Canon; Pedro Tejeda Paredes; Antonieta Maldonado Larroque<br><i>Colaboradoras:</i> Amparo Arrabal Martín; Agustina Matilla Marcos                                                                                                                                                              |
|        | Huelva  | Carlos Sánchez González             | Antonio Ortega Carpio; M. Eloisa Arias Fortes; Javier Ferraro García; Migliane Lima Costa; Isabel Ruiz Cumplido; Pilar Freire Pérez                                                                                                                                                                                                                                                                          |
|        | Jaén    | Eduardo Vázquez Ruiz de Castroviejo | Ramiro Aguilera Tejero; Fermina Bruque Sánchez; Pablo Tallón Povedano; Lorenzo Escabias Andreu; Víctor Figueroa Cardona; Alejandro Pérez Milena; José Moraleda Martínez; M. Dolores Rodríguez Serrano                                                                                                                                                                                                        |
|        | Málaga  | Juan Robledo Carmona                | Amparo Aragón Ramírez; Carlos Gutiérrez Maturana Camañes; Concepción Cañero Criado; Cristina Delgado Utrera; Dolores Muñoz Galán; Ignacio Boto Gutiérrez; Juan Luis Villamor Bueno; Vicente Villatoro Jiménez; Victoria Alcaraz Martínez<br><i>Colaboradores:</i> Belén Pajariño Gallego; Jacinta Meléndez Ortigosa; Vicente Raimundo Arrabal Pérez; Alberto Márquez López; María del Pilar Aguilar Trujillo |
|        | Sevilla |                                     | Antonio Casco Gallardo                                                                                                                                                                                                                                                                                                                                                                                       |
| Aragón | Huesca  | Javier Escota                       | Eva Aguaron Joven; José María Borrel Martínez; Juan Manuel Culebras Marco;                                                                                                                                                                                                                                                                                                                                   |

|                        |             |                                        |                                                                                                                                                                                                                                                                                |
|------------------------|-------------|----------------------------------------|--------------------------------------------------------------------------------------------------------------------------------------------------------------------------------------------------------------------------------------------------------------------------------|
|                        |             | Villanueva; Mariano Rodríguez Torrente | Dolores Idañez Rodríguez; Teófilo Lorente Aznar; Ana Rivera Fuertes; Carmen Quintana Velasco; Carlos Aisa Arenaz; José María Barrio Navascues; José María Castillo Olivera<br><i>Colaboradoras:</i> Inmaculada Lera Omiste; Gemma Ciria                                        |
|                        | Zaragoza    | Ricardo Gayán                          | Ana Avelino Terrón; M. Luisa Aznar Arribas; Pedro J. Marín Velázquez; Adolfo Benito Jiménez; Rafael Vargas Arévalo; José Fernando Pina; Jesús F. Romeo Ladrero; M. Asunción Alfaro Lozano; José Javier Calvo García; Jesús María Lasso Moreno                                  |
| Principado de Asturias | Asturias    | Inés Möller Bustinza                   | M. Teresa Saldaña Hernández; Manuel Berrocal Varela; Amador Jenaro Carbajal Cocina; Francisco Javier Claros González; Natalia Juesas Fernández; Joaquín Prieto Gutiérrez; Agustín Sánchez Hernández; Purificación Seijo González; Ana Picasso Martínez de Ubago                |
| Castilla-La mancha     | Albacete    | Moisés Barambio Ruiz                   | Antonio Cifuentes Verdú; Concepción Escolano Vizcaíno; Francisco Javier Ayllón Ayllón; Francisco Lorenzo Salido; Cándido Martínez García; María Concepción Casado Moragón; Antonio Martínez Lozano; Lucinio Carrión Valero; José Miguel Ocaña López; Mirian Martínez Carretero |
|                        | Ciudad Real | Luis Ruiz-Valdepeñas Herrero           | Raquel Bañón García; M. Teresa Alcaide Cornejo; Cristina Herráiz Serrano; Antonio Guindas Ruiz; Andrés Herrera Canales; Antonio-Lorenzo Ruiz Serrano; Francisco de Asís Asenjo Hernández; Ángel Fermín Pérez Sánchez; Alfonso Ruiz-Póveda García-Rojo; M. Isabel Ariza Sánchez |
|                        | Cuenca      | Antonio Melero Pita                    | Isidro Sanz Polo; Rafael Morilla Ramilo; Joaquín Román López Villar; Fernando Madero López; Alfredo Cabrejas Sánchez; Rosa M. Cejudo Serrano; Jesús Buendía Bermejo; Sagrario Saiz Santos; Adoración Romero Saiz; Julia Martín Lezana                                          |
|                        | Toledo      | Luis Rodríguez Padial                  | Raquel Parejo Míguez; José Ignacio Jaén Díaz; Ángel Alonso Alía; Alberto                                                                                                                                                                                                       |

|                 |           |                                                                                                 |                                                                                                                                                                                                                                                                                                                           |
|-----------------|-----------|-------------------------------------------------------------------------------------------------|---------------------------------------------------------------------------------------------------------------------------------------------------------------------------------------------------------------------------------------------------------------------------------------------------------------------------|
|                 |           |                                                                                                 | Sepúlveda Martín; María Vega Martínez Escudero; Miguel Laborda Peralta; José María Jiménez Rodríguez; M. Ángeles Adán Valero; Francisco Javier Alonso Moreno; Carmen Ramos López<br><i>Colaboradores:</i> Irene Martínez Giner; Jesús Adrián Sifuentes Hernández; María Dolores Martínez Malabia; Victoria Madiedo Acosta |
| Castilla y León | Ávila     | Igor Molina Puente                                                                              | Miguel Ángel Fernández Gutiérrez; Carlos de Cabo González; Lidia Sastre Jiménez; F. Javier Ríos Almarza; Blanca Noreña Delgado; Cesarina Rivas Hernández; Carlos Javier García Gómez; Juan Luis Martín Clavo; Alfonso Carlos Caro Picón; Benigno Sánchez Martín                                                           |
|                 | Burgos    | Germán Pérez Ojeda                                                                              | Ángel María Olea Movilla; Pedro Luis Estables Recansens; Lucinio Anaya Bernabe; Carmen Caballero Abad; Jesús García Cuadrillero; M. Felisa Lara Caballero; Benito Sanz Mozo; Felipe Eulalio Martín Rosón; M. Cruz González González                                                                                       |
|                 | León      | Norberto Alonso Orcajo; Raúl Carbonell de Blas; Cristina Pascual Vicente; Agustín Romero Blanco | Leonor Martín Santín; M. Isabel Fernández Marassa; Mercedes García de Celis; Elena Fernández Mielgo; Faustino Sánchez Sanmartino; Margarita Gallego de la Varga; Ángel Novoa Mato; Ana Isabel Barragán Marín; Jesús Marino Villamar Berceruelo                                                                            |
|                 | Palencia  | Chema Asín Guillén                                                                              | Juan Antonio Losmozos Sánchez; José Luis Durand Eguiluz; María Carmen Monge González; Enrique de Inés Martín; José Manuel Zumel Elices; Juan Manuel Durantez Cacharro; Tomás Manzano Benito; Isaac Alcalde García; M. Eugenia Barón Laguna                                                                                |
|                 | Salamanca | Javier Jiménez Candil                                                                           | Javier García Izquierdo; Julio Guerrero del Olmo; Luis García Ortiz; Carlos Hernán-Pérez Leal; José Calama Becerro; Carmen de Antonio Jiménez; Manuel                                                                                                                                                                     |

|          |            |                                                 |                                                                                                                                                                                                                                                                                                                                                                                                                                                        |
|----------|------------|-------------------------------------------------|--------------------------------------------------------------------------------------------------------------------------------------------------------------------------------------------------------------------------------------------------------------------------------------------------------------------------------------------------------------------------------------------------------------------------------------------------------|
|          |            |                                                 | Becerro Cereceda                                                                                                                                                                                                                                                                                                                                                                                                                                       |
|          | Segovia    | Carlos Junquera<br>Planas                       | Emilio García Ortega; Rosa María Fernández Santa Teresa; M. Concepción Manrique de la Fuente; Juan Francisco Gil García; Martín Merino Segovia; Fernando Mondejar Quirós; Javier González Perlado; Ana Isabel Herrero Cecilia; José de Pablo Álamo                                                                                                                                                                                                     |
|          | Soria      | Valentin del Villar<br>Sordo                    | M. Jesús de Pablo Ramos; Ana M. Cabrerizo Puente; M. Antonia Hernández Caballero; Antonio Alberto Gil Gómez; Francisco Javier Martínez Sanz; Luis Gutiérrez Moreno; Elena de Pablo Ramos; Ramón García Martínez; Ángel Lafuente Esteban; Gema Borque Molinos                                                                                                                                                                                           |
|          | Valladolid | María Jesús Rollán<br>Gómez                     | Rocío Velasco Pastor; M. Jesús Aller de la Fuente; Mercedes Redondo Valdeolmillos; Jesús María Aguilar García; Verónica Casado Vicente; Elpidio García Ramón; Luis Ángel Herrán Oteruelo; Jesús Francisco García Rodríguez; Enrique Sanz Monedero; Ruperto Sanz Cantalapiedra<br><i>Colaborador:</i> Miguel Ángel Morales Torres                                                                                                                       |
|          | Zamora     | José Antonio Ortiz de<br>Murua López            | Ángela Nistal Ramos; Francisco Javier Delgado Rodríguez; Luis Garrote Gutiérrez; Antonia Refoyo Enríquez; M. Dolores Rodríguez Martín; Pedro Martín Martín; Clodoaldo Pérez Ramos; Mercedes Prieto Mantellán; Gabriel González Panero; Alberto Jiménez Meléndez                                                                                                                                                                                        |
| Cataluña | Barcelona  | Amparo Álvarez<br>Auñón; Vicens Brossa<br>Loidi | Sandra Sabarich Flores; Judit Novo Salvador; Montserrat Llordés Llordés; María Eugenia Pérez Domínguez; Telma Cristina Vicentín; Francisco Javier Martínez Quílez; Francisco Javier Avilés Fernández; Laura Díaz Gete; Alicia Mostazo Muntané; Amelia Espinosa Santana; Antonia Llauger Roselló; M. Dolores Moriano García; Jordi Nadal Echevarria; M. Angels Salvador Millán; Herminio Moliner Lizondo<br><i>Colaboradora:</i> Monserrat Roca Vilalta |

|                      |           |                           |                                                                                                                                                                                                                                                                                  |
|----------------------|-----------|---------------------------|----------------------------------------------------------------------------------------------------------------------------------------------------------------------------------------------------------------------------------------------------------------------------------|
|                      | Girona    | Joan Sala Montero         | Josep Gil Yubero; Ferrán Cordón Granados; Montse Lloveras Clos; Emili Marco Segarra; Ramón Creus Bosch; Carmen López Sanmartín; Dídac Parramón i Font; Begoña Santana de Carlos; Cristina Servent Batlle<br><i>Colaboradoras:</i> Judith Pinsach Garanger; Laura Vegas Fernández |
|                      | Lleida    | Fernando Worner Diz       | Jorge Soler González; Marta Ortega Bravo; Antonio Rodríguez Rosich; Plácido Santafe Soler; Eduard Peñascal Pujol; José Masamunt Jove; José Luis Morera Serra; Olga Pérez Queiruga; Antoni V. Plana Blanco                                                                        |
|                      | Tarragona | Jordi Mercé Klein         | Merce Peri Viñes; Elisabeth Salsench Serrano; Eva María Oya Girona; Francisco Martín Luján; Rosa María Lara Ibáñez; Rafael Albiol Lluís; Ferrán Grifoll Ruiz; Irene Pascual Palacios; Dolores Gazol Soler                                                                        |
| Comunidad Valenciana | Alicante  | Alberto Cordero Fort      | Manuel Carlos Salas Tomás; Rosario García Santafe; Nieves Gómez Moreno; Salvador Pertusa Martínez; Soledad García Bevia; Luis Richard Rodríguez; Alberto Asencio Aznar<br><i>Colaboradora:</i> María Adsuar Adán                                                                 |
|                      | Castellón | Lorenzo Fácila Rubio      | José Vicente Herrero Ballestar; Beatriz Sánchez-Peral Sánchez; Amparo Antón Aguilera; M. José Manrique Costa; Manuel Batalla Sales; María Isabel Martí Giner; María Teresa Aguilar Arnau; M. Ángeles Goterris Pinto; M. Dolores Aicart Fort; M. José Monedero                    |
|                      | Valencia  | Francisco Ridocci Soriano | Fernando Quiles Añón; Juan Carlos Beguer Miquel; Asunción Girbes Revert; M. Angels Pages Juanola; María Teresa Villalba Calatayud; Amparo Castro Lorente                                                                                                                         |
| Extremadura          | Badajoz   | Antonio Merchán Herrera   | Macarena Candela Maestú; Juan José Dorado Martín; Antonio García Concellón; María S. Gil Llinás; Calixta Mantilla Calderón; Manuel Martínez de la Concha; Beatriz Pardo Díaz de Entresotos; Rosario T. Trinidad Ramos; José A. Morales Ruiz                                      |
|                      | Cáceres   | José Javier Gómez         | Fernando Pérez Escanilla; Carlos Arjona Mateos; Dimas Igual Fraile; Amparo                                                                                                                                                                                                       |

|                |                   |                                |                                                                                                                                                                                                                                                                        |
|----------------|-------------------|--------------------------------|------------------------------------------------------------------------------------------------------------------------------------------------------------------------------------------------------------------------------------------------------------------------|
| Galicia        | A Coruña          | Barrado                        | Gómez Espárrago; M. Socorro Gacto Fernández; José Polo García; Sebastián Traba Hernández; Sabina Rodríguez Borreguero; Alfonso Barquilla García                                                                                                                        |
|                |                   | José Ángel Rodríguez Fernández | David Bouza Álvarez; Luis Buendía Fernández; Francisco Javier Maestro Saavedra; Manuel Barral Castro; Juan Manuel Peteiro Martínez; José Luis Díaz Santiago; Concepción Blanco Sánchez; Cristina Iglesias Díaz                                                         |
|                | Lugo              | Ana Testa Fernández            | Germán Fernández López; José Enrique Cajiao Bonome; José Manuel Menéndez Tamargo; Cristina Arijón Barazal; Vicente Quirós Madariaga; Domingo D. García Rivas; Domingo Fernández Méndez; M. Teresa García Novo; Bernardino Pardo Teijeiro                               |
|                | Ourense           | Manuel García García           | Rosario Calle Custodio; Alberto J. del Alamo Alonso; Pedro Blanco Iglesias; Antonio Pedreira Penedo; M. Dolores Antolín Novoa; Ana Veiga Vázquez; Agapito Diéguez Estévez; Jorge Lloveres Insua; Aida Robles Castiñeiras                                               |
|                | Pontevedra        | Francisco Calvo Iglesias       | Evangelina Filloy Miguez; José Carlos Sendín Sánchez; Xesús Fernández Núñez; Juan José Crespo Sabaris; José Rubio Panadeiros; M. Luisa Blázquez Ballesteros; Manuel Domínguez Sardiña; M. Begoña Porritt Lueiro; Manuel M. Lorenzo San Martín; Francisco López Sobrino |
| Islas Baleares | Palma de Mallorca | David Crémer Luengos           | Natalia Feuerbach Achtel; Montserrat de la Torre Vidal; Alejandro Pizá Colom; Adriano Juan Mayrata Vicens; Cristina Gadea Ruiz; Catalina Picornell Yanes; Montserrat Sauleda Pares; Carmen López Moreno; Francisca Bestard Reus; Silvia Martín Delgado                 |
| Canarias       | Las Palmas        | M. Antonia Viña Liste          | Pedro J. Díaz Alayón; Luis Antonio Escalada Muñoz; Juan Pedro Jiménez Sarmiento; Beatriz Pérez López; Domingo Guerra Vega; Emilio Sánchez Carrión; Javier Santana Quilez; Gloria Calero González; Tomás González Rodríguez; Carmen Berrio Santana                      |
|                | Santa Cruz de     | Horacio Pérez                  | Nicolás Maffiotte Carrillo; Juan Francisco Tejera Cabrera; Alfredo Bartolomé                                                                                                                                                                                           |

|                            |           |                                               |                                                                                                                                                                                                                                                                                                                  |
|----------------------------|-----------|-----------------------------------------------|------------------------------------------------------------------------------------------------------------------------------------------------------------------------------------------------------------------------------------------------------------------------------------------------------------------|
| La Rioja                   | Tenerife  | Hernández                                     | Andrés; Emma Navarro Brito; Francisco José Castro Álvarez                                                                                                                                                                                                                                                        |
|                            | La Rioja  | Adrián Beloscar Llorca; Alfonso Jiménez Galán | José Tomás Gómez Saenz; Juan Manuel Marrodan Adan; Julio Peña Angos; Alejandro Paradiñeiro Somoza; Jesús M. Gutiérrez de Bobadilla; José María Martínez Martínez; Ignacio Fernández Hurtado; Mikel Ugalde Olano; Juan José García Díaz; Oscar León Fernández                                                     |
| Comunidad de Madrid        | Madrid    | José María Serrano Antolin                    | Antonio Sánchez Serrano; Belén Muñoz Gómez; M. José García Sacristán; Rocío Balas Urea; M. José Rojas Giraldo; Mar Noguero Álvarez; Carlos Díaz Gómez-Calcerrada; Ignacio Arjona Anchoriz; Rocío Vello Cuadrado                                                                                                  |
| Región de Murcia           | Murcia    | Manuel Villegas García                        | María Xania de Casas Fernández; Rafael Luquín Martínez; Antonio Javier Llorens Minguell; M. del Carmen Paniagua Merchán; Concepción Carvajal Lucerga; Montserrat Martínez Sánchez; M. Isabel Caceres López; M. José Miras Martínez; Manuel Haenelt Maguel; Ana Celia Melgar García                               |
| Comunidad Foral de Navarra | Navarra   | Marisol Alcasena Juango                       | Vicente Estremera Urabayen; Juan Manuel Pérez Gómez; Ramón Villanueva Moreno; M. Teresa Salinas Videndo; M. del Mar Hernández Espinosa; Carlos Figuero Echeverría; José Manuel Calleja Pascual; Arturo Erlanz Abad; Jesús Javier Jurio Burgui                                                                    |
| País Vasco                 | Álava     | Maruja Bello Mora                             | Jon Azkarate Zubiaur; M. Asunción Aldecoa Eguillor; Juan Francisco Pérez de San Román Setien; Laura Ortiz de Lazcano Herrera; Lucía Pereda López; María Angeles Calvo Gainzarain; Olga Ruiz de Arbulo Ruiz de Alegría; Juan Carlos Martín Fernández Landa; Luis Laborda González; Francisco Javier Blanco Cuadra |
|                            | Guipúzcoa | Esther Recalde                                | José Ramón Chopitea Gabiola; Aintzane Abasolo García; Miguel Mier Cascallana                                                                                                                                                                                                                                     |
|                            | Vizcaya   | Nekane Murga Eizagaetxebarría                 | Ana Isabel Izaguirre Berasategui; Juan Bautista Loizaga Horno; Cristina Lekube Angulo; José Ángel Del Pozo Yruegas; Alazne Ramoneda Errazquin; Igone Asua Angulo; Epifanio Álvarez Grande; María Natividad De Soto Gorroño;                                                                                      |



---

Rosario Angulo Rivero

---

### **Centro de lectura de electrocardiogramas**

| <i>Centro</i>                                 | <i>Coordinadora</i>  | <i>Otros miembros del grupo</i>                                                                                                                                                                                   |
|-----------------------------------------------|----------------------|-------------------------------------------------------------------------------------------------------------------------------------------------------------------------------------------------------------------|
| Hospital Universitario de Fuenlabrada, Madrid | Paula Awamleh García | Alejandro Curcio Ruigómez; Carmen Cristóbal Valera; Adolfo Fontenla Cerezuela; Catherine Graupner Abad; Rosa María Jiménez Hernández; José María Serrano Antolín; Pedro Talavera Sánchez; Rodrigo Teijeiro Mestre |

---

### **Instituciones**

*Consejería de Salud de la Junta de Andalucía*  
*Servicio Aragonés de Salud, Gobierno de Aragón*  
*Consejería de Sanidad del Principado de Asturias*  
*Servicio de Salud de Castilla-La Mancha*  
*Consejería de Sanidad de la Junta de Castilla y León*  
*Conselleria de Salut de la Generalitat de Catalunya*  
*Conselleria de Sanitat de la Generalitat Valenciana*  
*Consejería de Sanidad, Gobierno de Extremadura*  
*Conselleria de Sanidade de la Xunta Galicia*  
*Conselleria de Salut i Consum, Govern de les Illes Balears*  
*Consejería de Sanidad, Gobierno de Canarias*  
*Consejería de Sanidad, Gobierno de la Rioja*  
*Consejería de Sanidad de la Comunidad de Madrid*  
*Consejería de Sanidad y Política Social, Región de Murcia*  
*Consejería de Sanidad, Gobierno de Navarra*  
*Consejería de Sanidad del Gobierno Vasco*

---

### **Centro coordinador y de análisis de datos**

| <i>Centro</i> | <i>Responsable análisis de</i> | <i>Gestión de base de datos, entrenamiento de</i> | <i>Monitora del proyecto y responsable de call-center</i> |
|---------------|--------------------------------|---------------------------------------------------|-----------------------------------------------------------|
|---------------|--------------------------------|---------------------------------------------------|-----------------------------------------------------------|

---

| <i>datos</i> |                     | <i>médicos participantes y coordinadora de trabajo de campo</i> |                          |
|--------------|---------------------|-----------------------------------------------------------------|--------------------------|
| ODDS, S.L.   | Soly Santiago Pérez | Teresa Rosalía Pérez Castro                                     | M. Luisa López Domínguez |

## ANEXO 2. VARIABLES CLÍNICAS ESTUDIADAS

### Variables clínicas: definiciones

#### *Hipertensión arterial*

Se clasifica como tal si cumple al menos uno de los siguientes criterios:

- Historia de HTA diagnosticada y tratada con medicación, dieta o ejercicio
- Presión arterial sistólica > 140 o diastólica > 90 en al menos 2 tomas el día del examen
- Uso actual de tratamiento farmacológico antihipertensivo

#### *Hipercolesterolemia*

Colesterol total  $\geq$  200 mg/dl el día del examen o tratamiento con fármacos hipolipemiantes

#### *Obesidad*

IMC  $\geq$  30 kg/m<sup>2</sup>

#### *Sobrepeso*

IMC  $\geq$  25 kg/m<sup>2</sup> y < 30 kg/m<sup>2</sup>

#### *Diabetes*

Diagnóstico previo de diabetes a tratamiento con antidiabéticos orales o insulina o glucemia basal  $\geq$  126 mg/dl el día del examen

#### *Fumador actual*

Fumador activo en el mes de la recogida de datos

#### *Insuficiencia cardíaca*

Diagnosticada tras ingreso hospitalario (incluye estancia en urgencias hospitalarias). Necesario disponer de informe hospitalario

#### *Antecedentes personales de ACV*

Existe constancia documental de al menos una de las siguientes:

- ACV isquémico o hemorrágico establecido
- Accidente isquémico transitorio
- Oclusión carotídea > 75%
- Cirugía o angioplastia carotídea previa

- Secuelas de ACV

---

*Antecedentes personales de arteriopatía periférica*

---

Existe constancia de alguna de las siguientes:

- Claudicación intermitente
- Amputación por insuficiencia arterial periférica
- Revascularización vascular (*bypass* o angioplastia)
- Aneurisma aórtico documentado
- Test no invasivo positivo (p. ej., Eco-Doppler, angio-RM o índice muñeca-brazo < 0,8)

---

*Antecedentes personales de enfermedad pulmonar crónica*

---

Existe historia documentada de enfermedad pulmonar crónica o está actualmente en tratamiento farmacológico (esteroides, inhaladores) y/o presenta  $FEV_1 < 75\%$  o  $PaO_2 < 60\%$  o  $PaCO_2 > 50\%$

---

*Antecedentes personales de patología tiroidea*

---

Si el paciente ha tomado o toma tratamiento antitiroideo por hipertiroidismo o actualmente recibe suplementos tiroideos por hipotiroidismo

---

*Antecedentes personales de cardiopatía isquémica*

---

Si existe constancia de al menos uno de los siguientes:

- Ingreso hospitalario por IAM
- ECG diagnóstico de IAM (onda Q patológica en más de una derivación contigua)
- Si existe constancia de ingreso hospitalario con el diagnóstico de angina inestable o SCA (no IAM)
- Si existe constancia de cirugía previa de *bypass* aortocoronario
- Si existe constancia de cualquier tipo de ICP previa

---

*Antecedentes personales de implantación de marcapasos o DAI*

---

Si existe constancia de la implantación de un dispositivo de este tipo

---

ACV: accidente cerebrovascular; angio-RM: angiorresonancia magnética; DAI: desfibrilador automático implantable; ECG: electrocardiograma; FEV<sub>1</sub>: volumen espiratorio máximo en el primer segundo; HTA: hipertensión arterial; IAM: infarto agudo de miocardio; ICP: intervención coronaria percutánea; IMC: índice de masa corporal; PaCO<sub>2</sub>: presión parcial de dióxido de carbono en sangre arterial; PaO<sub>2</sub>: presión parcial de oxígeno en sangre arterial; SCA: síndrome coronario agudo.
